# Supplementary material for: Development of a hydroxyapatite-based composite: Sr-doped HAp/NiO proven to be an efficient nanocatalyst for photocatalytic degradation of organic dye and photoreduction of Cr(vi)
Source: Royal Society of Chemistry journal article supplement (doi:10.1039/d4nj02413c), 2024-01-01
Supplement: d4nj02413c1.pdf [file d4nj02413c1.pdf]

## Supporting Information

### Development of a hydroxyapatite based composite: Sr-doped HAp/NiO proven to be an efficient nanocatalyst for photocatalytic degradation of organic dye and photoreduction of Cr (VI)

Linkon Bharali, Susmita Sahu, Juri Kalita, Siddhartha Sankar Dhar<sup>\*a</sup>

<sup>[a]</sup> Department of Chemistry, National Institute of Technology Silchar, Cachar, Assam-788010, India.

| SI No. | Figure                | Content                                                                                                      |
|--------|-----------------------|--------------------------------------------------------------------------------------------------------------|
| 1      | Figure S1             | PXRD Spectrum of Pure HAp                                                                                    |
| 2      | Figure S2 (a) and (b) | PXRD Spectrum of prepared materials compared with their standard PXRD spectra                                |
| 3      | Figure S3             | FT-IR Spectrum of Pure HAp                                                                                   |
| 4      | Figure S4             | UV-DRS spectrum and Bandgap of pure HAp                                                                      |
| 5      | Figure S5             | Effect of various quenchers in the photodegradation process                                                  |
| 6      | Figure S6             | HR LC-MS spectrum of CR dye solution before degradation                                                      |
| 7      | Figure S7             | HR LC-MS spectrum of CR dye solution after degradation                                                       |
| 8      | Figure S8             | Some major molecular fragments of the CR dye obtained from HR LC-MS spectrum recorded after photodegradation |
| 9      | Figure S9             | Effect of photocatalytic performance of each components of the prepared nanocatalyst                         |
| 10     | Figure S10            | SEM image and TEM images of reused catalyst                                                                  |
| 11     | Figure S11            | PXRD Spectrum of the reused catalyst                                                                         |

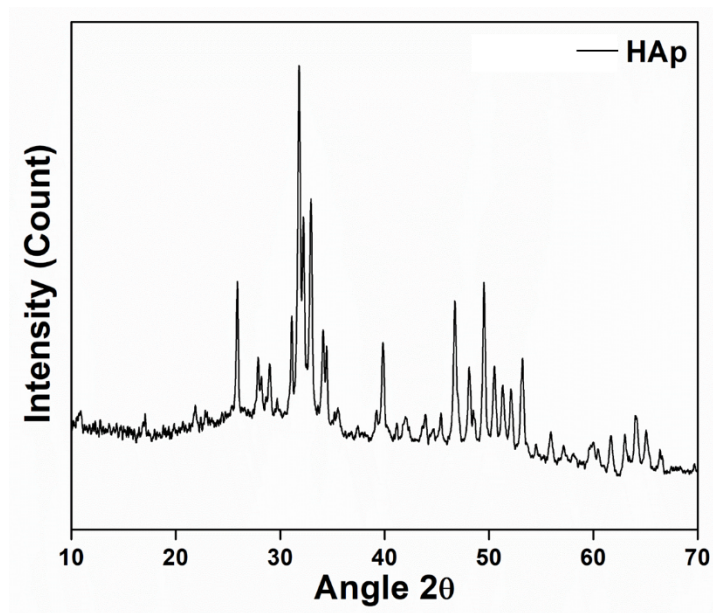

Figure S1. PXRD spectrum of pure HAp

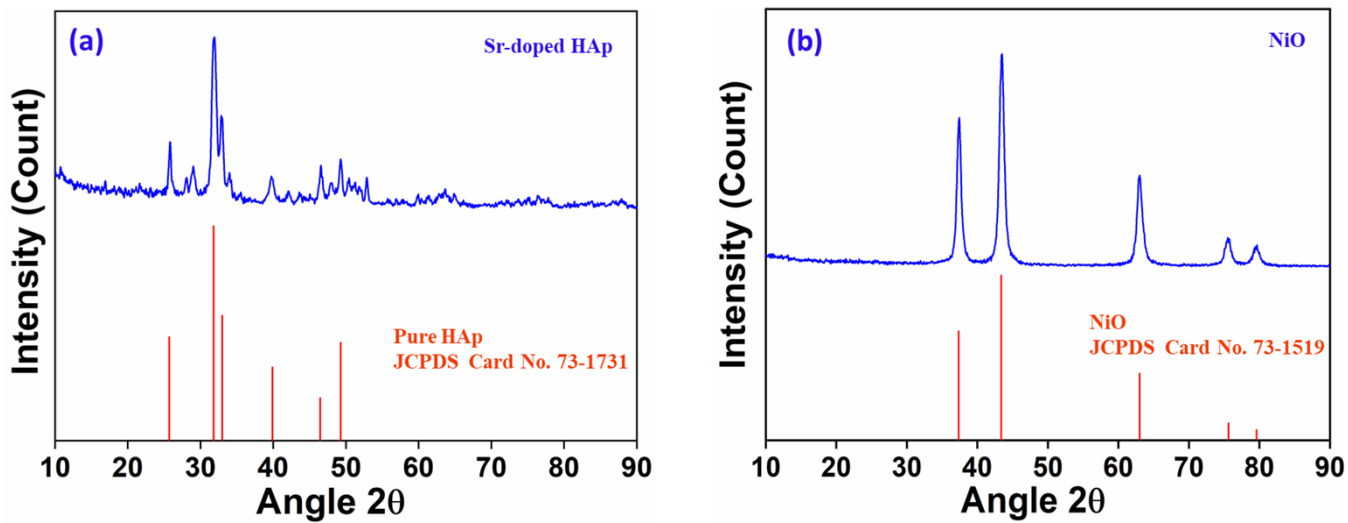

Figure S2. PXRD Spectrum of (a) prepared Sr-doped HAp compared with standard PXRD spectrum of Pure HAp and (b) prepared NiO compared with standard PXRD spectrum of Pure NiO

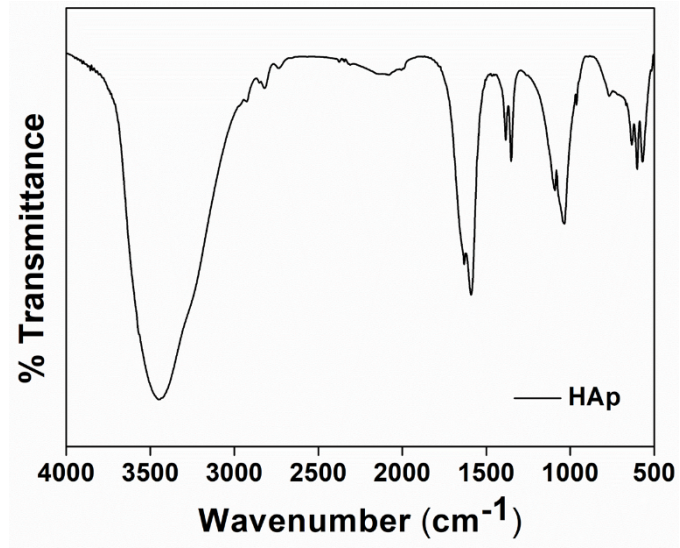

Figure S3. FT-IR spectrum of pure HAp

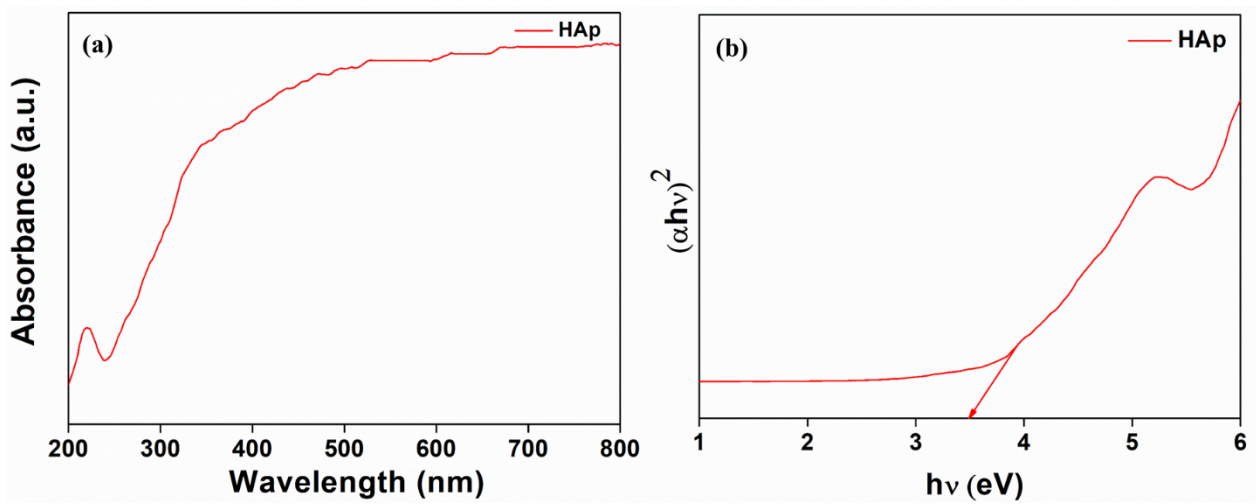

Figure S4. UV-DRS spectrum and bandgap energy of pure HAp

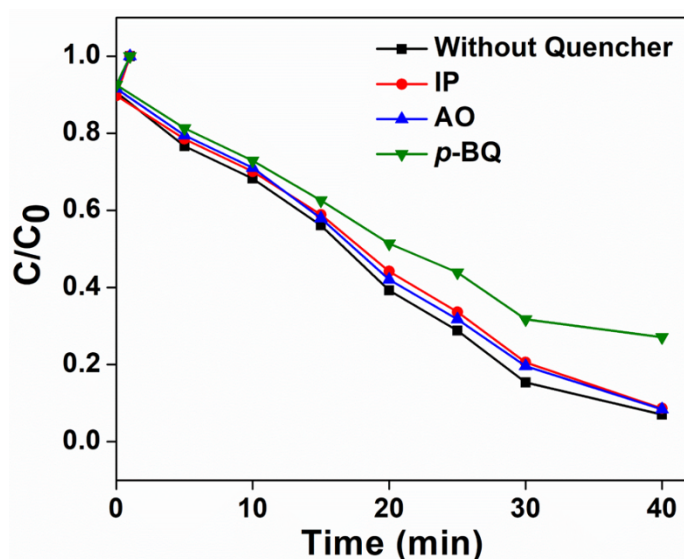

Figure S5. Effect of various quenchers in the photodegradation process

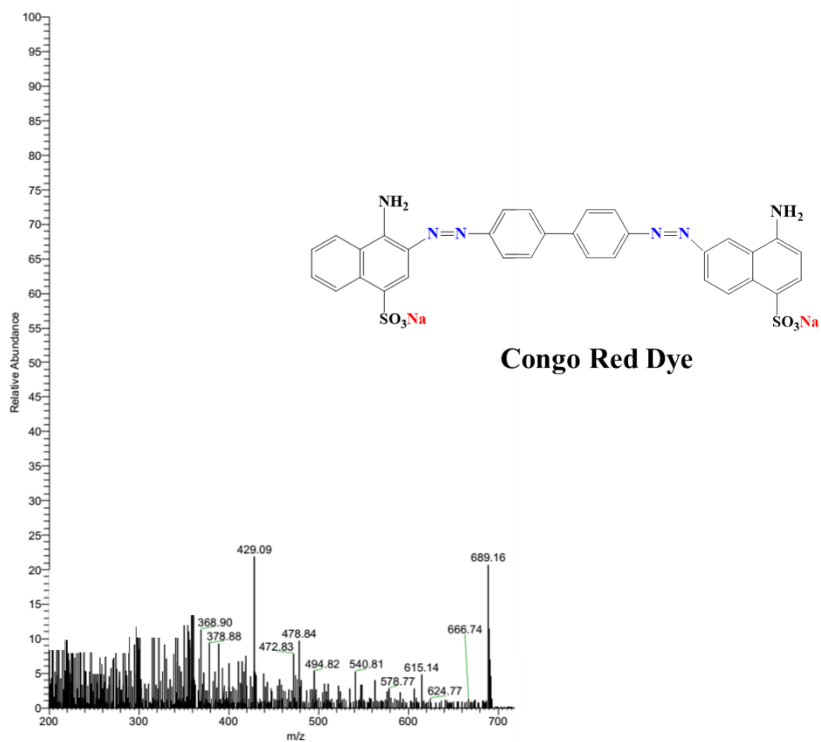

Figure S6. HR LC-MS spectrum of CR dye solution before degradation

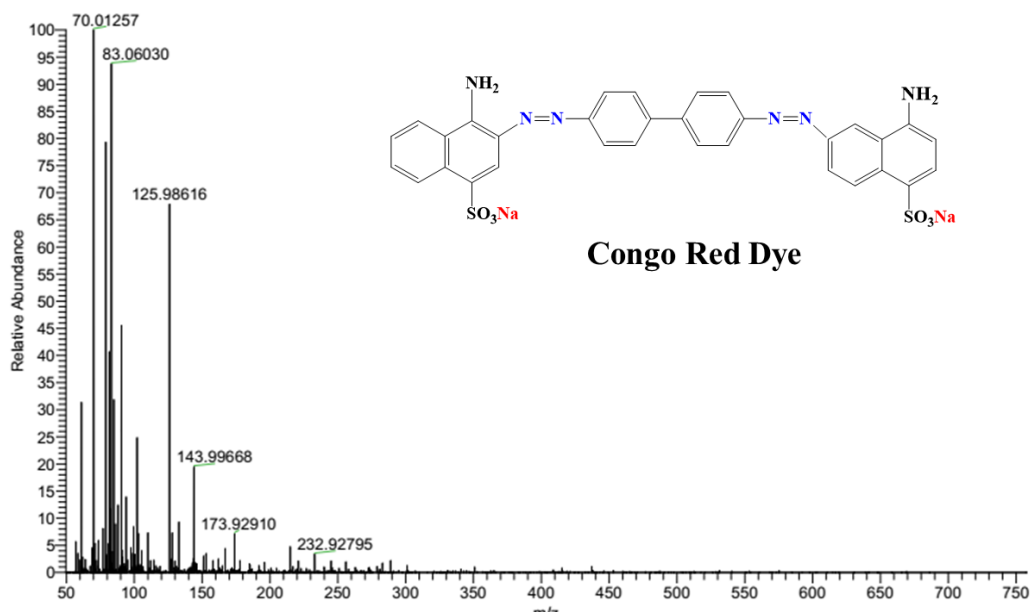

Figure S7. HR LC-MS spectrum of CR dye solution after degradation

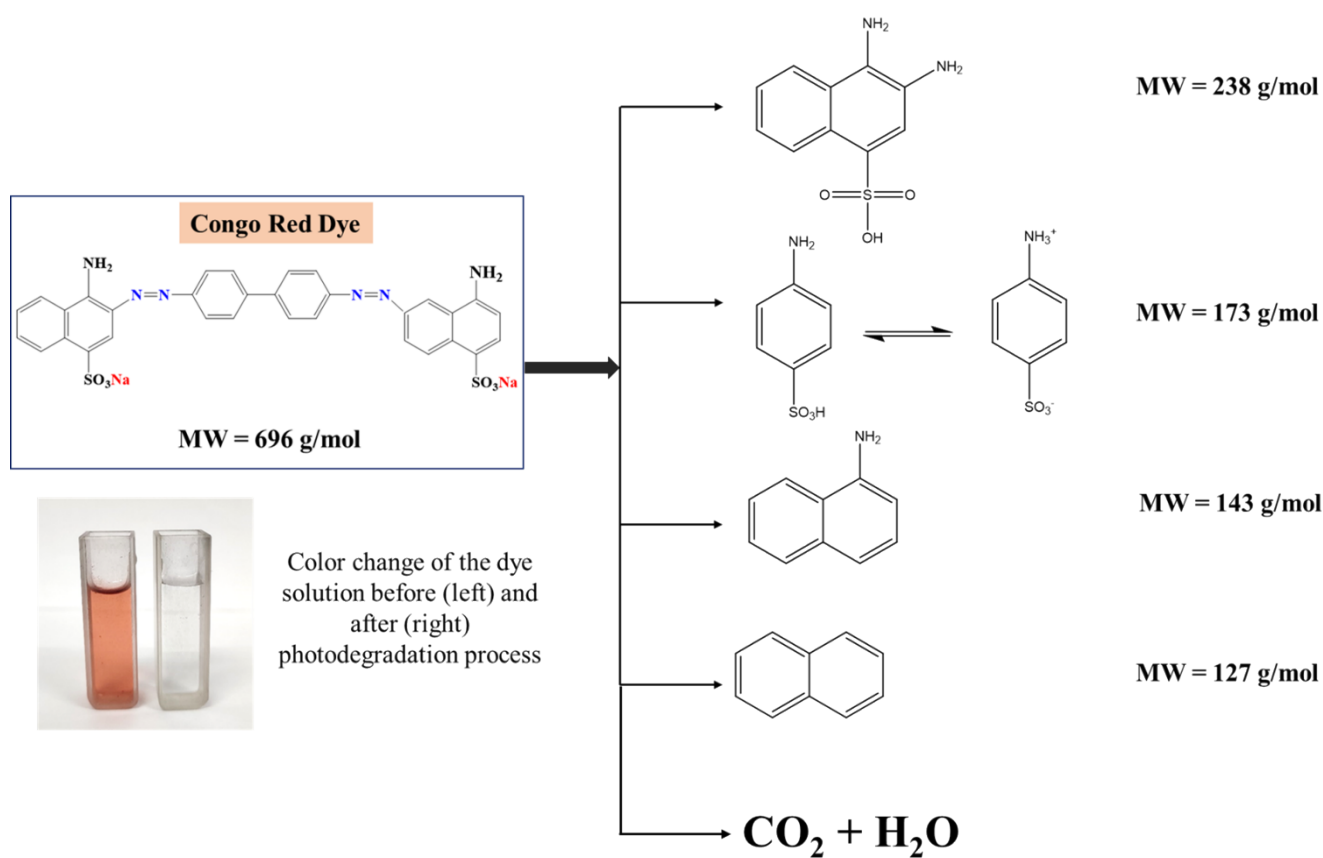

Figure S8. Some major molecular fragments of the CR dye obtained from HR LC-MS spectrum recorded after photodegradation



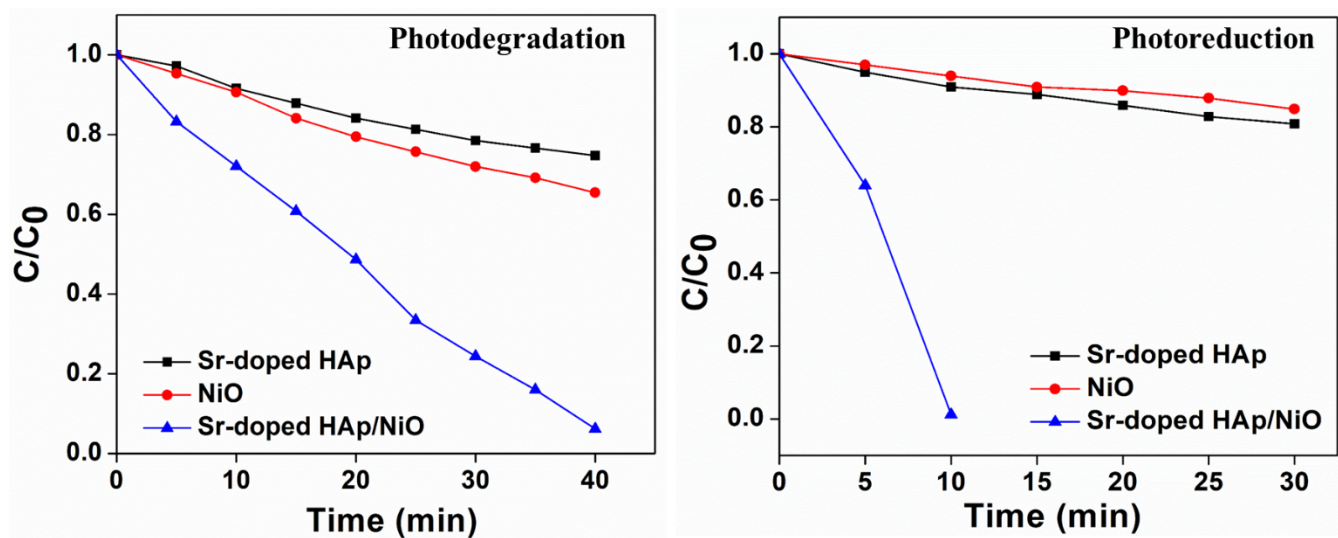

Figure S9. Effect of photocatalytic performance of each components of the prepared nanocatalyst

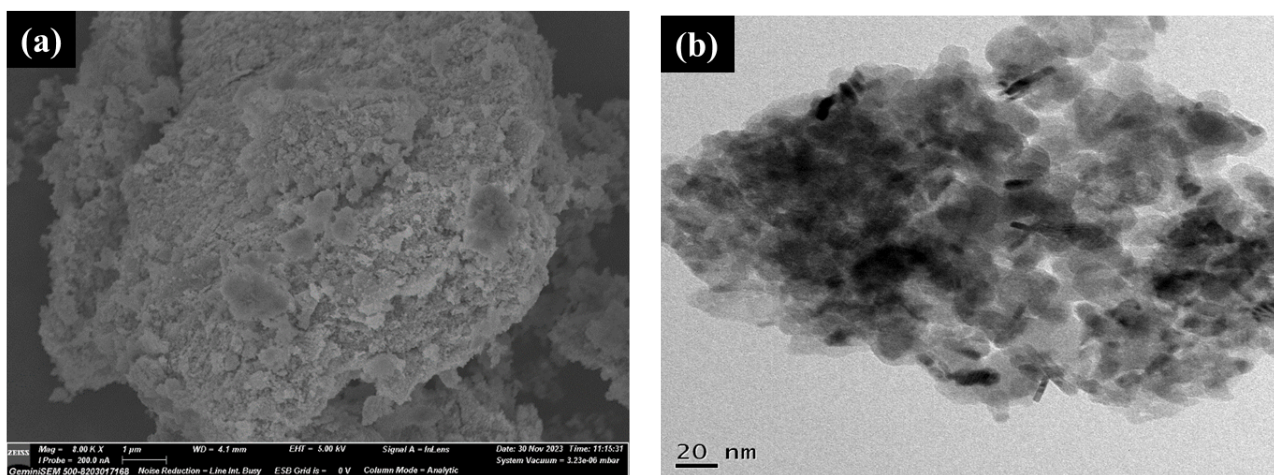

Figure S10. (a) SEM image and (b) TEM images of reused catalyst

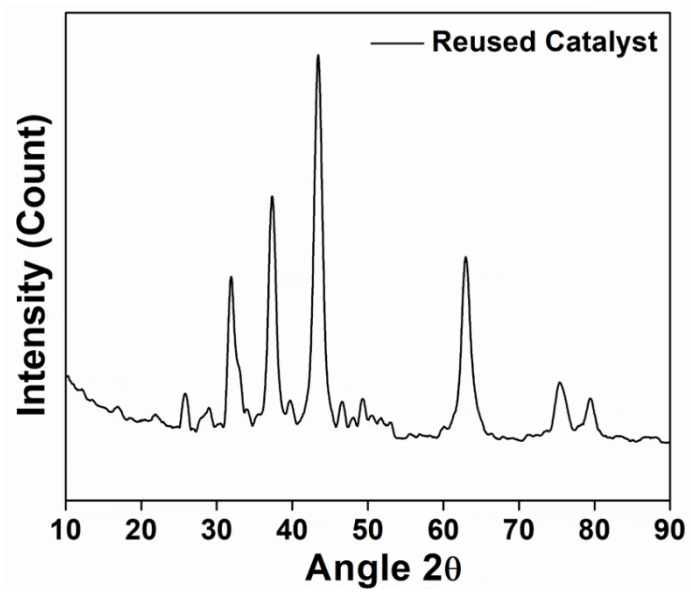

Figure S11. PXRD Spectrum of the reused catalyst
